# Supplementary material for: Transport of cerium oxide nanoparticles in saturated silica media: influences of operational parameters and aqueous chemical conditions
Source: PubMed Central journal article supplement (PMC5046158; doi:10.1038/srep34135), 2016-10-03
Supplement: srep34135-s1.pdf [file srep34135-s1.pdf]

1  
2  
3  
4  
5  
6  
7  
8  
9  
10  
11  
12  
13  
14  
15  
16  
17  
18  
19

# Supplementary Material

## Transport of cerium oxide nanoparticles in saturated silica media: influences of operational parameters and aqueous chemical conditions

Zhaohan Zhang<sup>a,b1</sup>, Peng Gao<sup>a1</sup>, Ye Qiu<sup>a</sup>, Guohong Liu<sup>a</sup>, Yujie Feng<sup>a\*</sup>, Mark Wiesner<sup>b\*\*</sup>

- a. State Key Laboratory of Urban Water Resource and Environment, Harbin Institute of Technology, No73, Huanghe Road, Nangang District, Harbin 150090, China
- b. Center for the Environmental Implications of Nano Technology, Duke University, Durham, North Carolina 27708, United States

\* Corresponding authors: yujief@hit.edu.cn (Y.J. Feng); wiesner@duke.edu (Mark Wiesner)

Number of pages: 4

Number of figures: 2

Number of tables: 0

20 **Contents**

21 **Fig. S1** Variation of normalized column effluent concentrations with pore volumes  
22 number under different concentrations of BSA (a) and HA (b). Results were obtained  
23 at 1 mL 100 mg/L CeO<sub>2</sub>-NPs injection, 50 mM NaCl as background electrolyte, pH  
24 5.54 and flow rate 2 mL/min.

25 **Fig. S2** The UV-Visible spectra (a), size distribution (b), zeta potential (c) and TEM (d)  
26 of the CeO<sub>2</sub>-NPs dispersed suspensions.

27

28

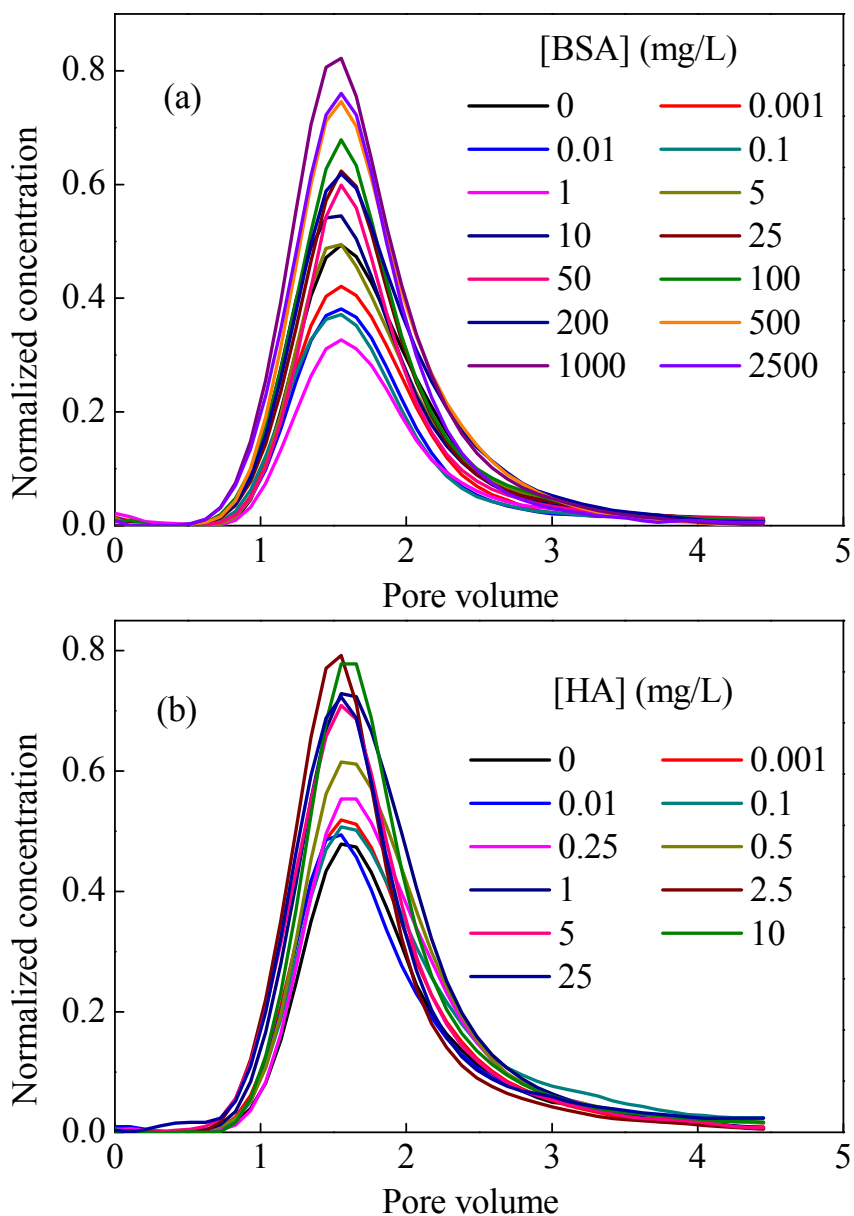

30

31 **Fig. S1** Variation of normalized column effluent concentrations with pore volumes  
 32 number under different concentrations of BSA (a) and HA (b). Results were obtained  
 33 at 1 mL 100 mg/L CeO<sub>2</sub>-NPs injection, 50 mM NaCl as background electrolyte, pH  
 34 5.54 and flow rate 2 mL/min.

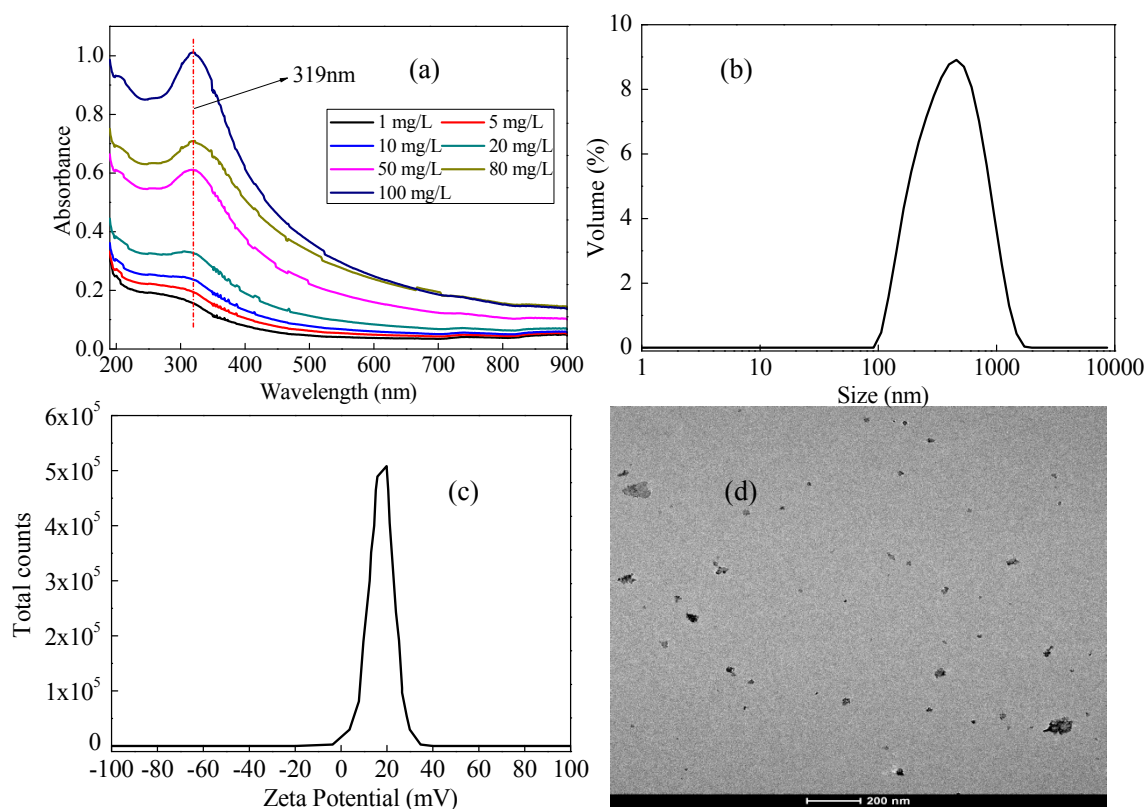

36

37 **Fig. S2** The UV-Visible spectra (a), size distribution (b), zeta potential (c) and TEM (d)  
38 of the CeO<sub>2</sub>-NPs dispersed suspensions.
